# Supplementary material for: High-calorie diets uncouple hypothalamic oxytocin neurons from a gut-to-brain satiation pathway via κ-opioid signaling
Source: PubMed Central journal article supplement — Cell Rep. 2023 Oct 31;42(10):113305. doi: 10.1016/j.celrep.2023.113305 (PMC10636643; doi:10.1016/j.celrep.2023.113305), 2023-10-31
Supplement: mmc1.pdf [file mmc1.pdf]

**Supplemental information**

**High-calorie diets uncouple hypothalamic  
oxytocin neurons from a gut-to-brain  
satiating pathway via  $\kappa$ -opioid signaling**

**Tim Gruber, Franziska Lechner, Cahuê Murat, Raian E. Contreras, Eva Sanchez-Quant, Viktorian Miok, Konstantinos Makris, Ophélie Le Thuc, Ismael González-García, Elena García-Clave, Ferdinand Althammer, Quirin Krabichler, Lisa M. DeCamp, Russell G. Jones, Dominik Lutter, Rhiannan H. Williams, Paul T. Pfluger, Timo D. Müller, Stephen C. Woods, John Andrew Pospisilik, Celia P. Martinez-Jimenez, Matthias H. Tschöp, Valery Grinevich, and Cristina García-Cáceres**

**Figure S1**

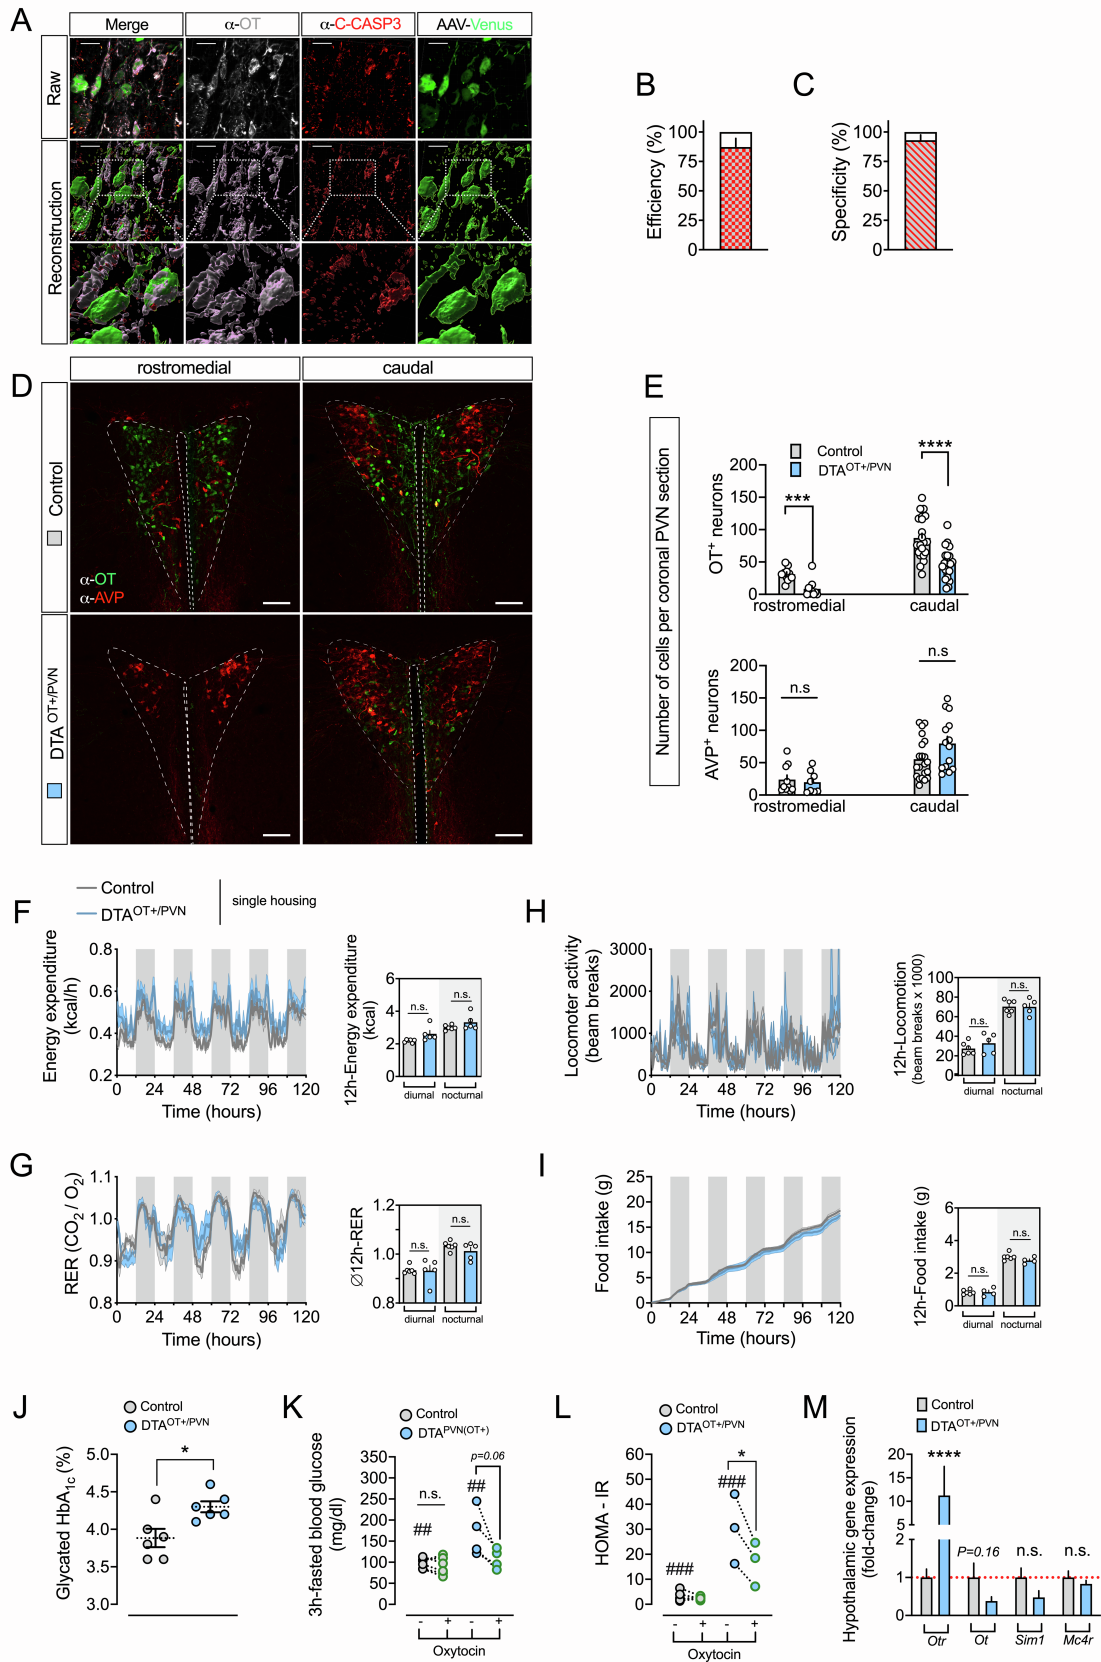

**Figure S1. Related to Figure 1: Virus-mediated ablation of PVN<sup>OT</sup> neurons induces hyperphagic obesity that is rectifiable by exogenous oxytocin treatment and associated with CCK resistance.**

**(A)** Representative, 3D rendered confocal micrographs of DTA<sup>OT+/PVN</sup> mice showing pro-apoptotic PVN<sup>OT</sup> neurons 5 days after AAV injections. C-CASP3 immunoreactivity (red) co-localizes with the majority of OT<sup>+</sup> (gray) and AAV-Venus<sup>+</sup> (green) neurons, but not with neighboring cells as indicated in the raw images (upper panel), the reconstructed images (middle panel), and the reconstructed magnified insert (lower panel). Scale bar, 20  $\mu$ m.

**(B)** Corresponding quantification of ablation efficiency presented as percentage of all OT<sup>+</sup> neurons (gray) also expressing C-CASP3 (red). n = 5 mice, 543 neurons.

**(C)** Corresponding quantification of ablation specificity presented as percentage of all C-CASP3<sup>+</sup> cells (red) also expressing OT (gray). n = 5 mice, 543 neurons.

**(D)** Representative confocal micrographs of brain sections showing OT<sup>+</sup> neurons (green) and AVP<sup>+</sup> neurons (red) of control mice and DTA<sup>OT+/PVN</sup> mice at the rostromedial and caudal levels of the PVN. Scale bar, 100  $\mu$ m.

**(E)** Corresponding quantification of OT neuron count (upper panel) and AVP neuron count (lower panel) control mice and DTA<sup>OT+/PVN</sup> mice at the rostromedial and caudal levels. n = 5-7, 3-5 hemisections per mouse.

**(F)** Hourly energy expenditure as measured by indirect calorimetry in metabolic cages of single-housed control mice and DTA<sup>OT+/PVN</sup> mice (left panel) as well as average 12h-energy expenditure (right panel). Data are presented as mean  $\pm$  SEM. \*\* P < 0.01, \*\*\*\* P < 0.0001. n = 5-7 mice (two-way ANOVA (left panel) and unpaired Student's *t*-test (right panel)).

**(G)** Hourly respiratory exchange ratio (RER) as measured by indirect calorimetry in metabolic cages of single-housed control mice and DTA<sup>OT+/PVN</sup> mice (left panel) as well as average 12h-RER (right panel). Data are presented as mean  $\pm$  SEM. n.s., not significant. n = 5-7 mice (two-way ANOVA (left panel) and unpaired Student's *t*-test (right panel)).

**(H)** Hourly locomotor activity as measured by beam breaks in metabolic cages of single-housed control mice and DTA<sup>OT+/PVN</sup> mice (left panel) as well as average 12h-locomotion (right panel). Data are presented as mean  $\pm$  SEM. n.s., not significant. n = 5-7 mice (two-way ANOVA (left panel) and unpaired Student's *t*-test (right panel)).

**(I)** Cumulative food intake of single-housed control mice and DTA<sup>OT+/PVN</sup> mice (left panel) as well as average 12h-food intake (right panel). Data are presented as mean  $\pm$  SEM. n.s., not significant. n = 5-7 mice (two-way ANOVA (left panel) and unpaired Student's *t*-test (right panel)).

**(J)** Quantification of glycated HbA<sub>1c</sub> in a separate cohort of DTA<sup>OT+/PVN</sup> mice and control mice. Data are presented as mean ± SEM. n.s., not significant. \* P < 0.05. n = 6 mice (unpaired Student's *t*-test).

**(K)** Quantification of 3h-fasted blood glucose before and after treatment with bi-daily OT (500 nmol/kg BW; s.c.) in DTA<sup>OT+/PVN</sup> mice and control mice. Data are presented as mean ± SEM. ## P < 0.01, n.s., not significant. n = 5-7 mice (one-way ANOVA and paired Student's *t*-test).

**(L)** Quantification of HOMA-IR before and after treatment with bi-daily OT (500 nmol/kg BW; s.c.) in DTA<sup>OT+/PVN</sup> mice and control mice. Data are presented as mean ± SEM. \* P < 0.05, ### P < 0.001, n.s., not significant. n = 5-7 mice (one-way ANOVA and paired Student's *t*-test).

**(M)** Relative gene expression of mRNA for *Otr*, *Ot*, *Sim1* and *Mc4r* in the hypothalamus of DTA<sup>OT+/PVN</sup> mice normalized to control mice. Data are presented as mean ± SEM. \* P < 0.05, n.s., not significant. n = 4 mice (unpaired Student's *t*-test).



Figure S2

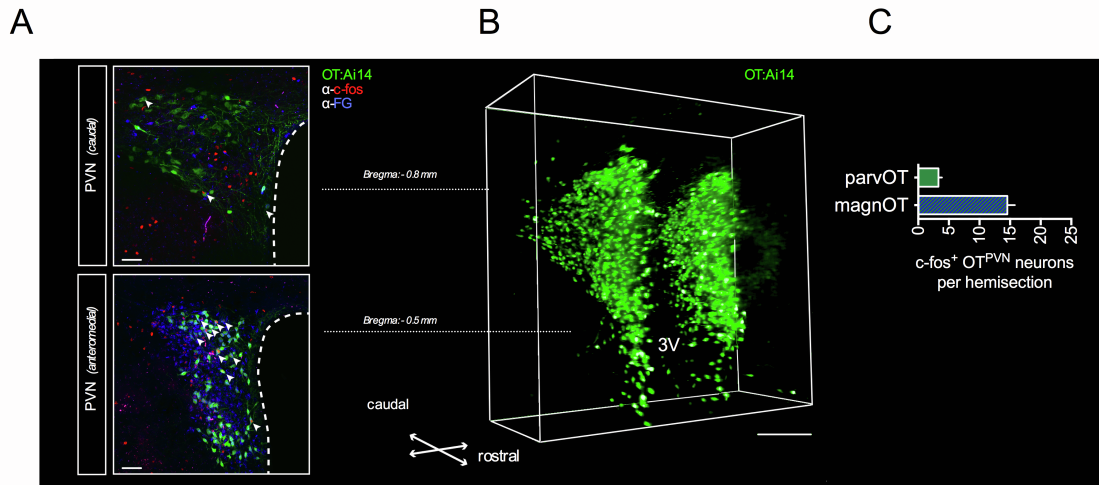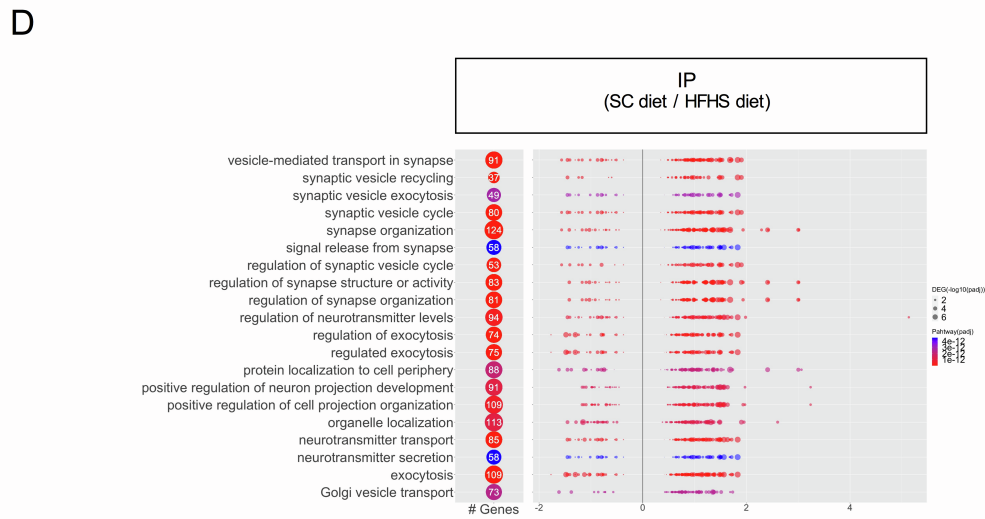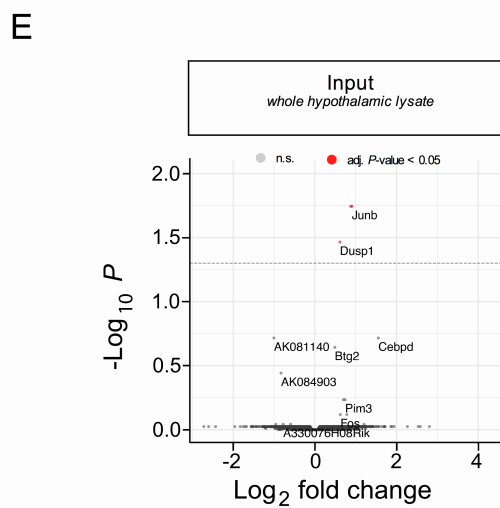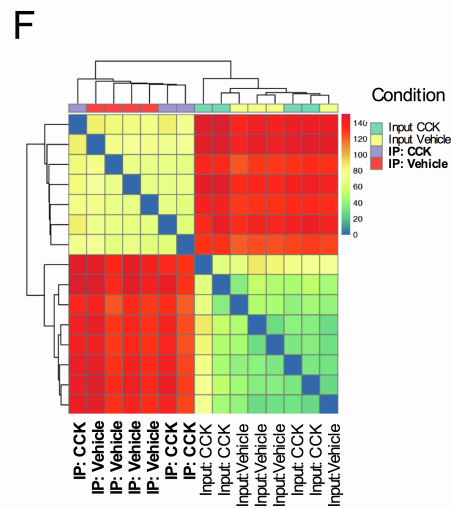

**Figure S2. Related to Figure 2: Chronic exposure to a HFHS diet impairs the electrical and transcriptional activation of PVN<sup>OT</sup> neurons in response to peripheral CCK.**

**(A)** Representative confocal micrographs of coronal brain sections from adult male OT:Ai14 reporter mice containing the PVN at the caudal (upper panel) and anteromedial (lower panel) level relative to bregma. Mice received fluorogold (FG; 15 mg/kg BW *i.p.*) 7 days prior sacrifice in order to label magnOT neurons, which form neurohemal contacts at the posterior pituitary (FG<sup>+</sup>; blue). On the day of experiment, mice were injected with CCK (20 µg/kg BW *i.p.*) and consequent activation of PVN<sup>OT</sup> neurons (green) was quantified by means of nuclear c-fos immunoreactivity (red). Scale bar, 50 µm.

**(B)** 3D rendered confocal scan of iDISCO-cleared coronal brain section from an adult male OT:Ai14 reporter mouse spanning the entirety of the PVN (1 mm). Scale bar, 1 mm.

**(C)** Quantification of total c-fos<sup>+</sup> PVN<sup>OT</sup> neuronal subpopulations from (A) differentiating between parvOT (FG<sup>-</sup>) and magnOT (FG<sup>+</sup>) subsets.

**(D)** GO enrichment analysis of DEG comparing IP of OT:RiboTag mice either fed SC diet or HFHS diet. Top enriched pathways number of DEG are indicated in the left panel, while the color indicates the adjusted p-value. Each pathway DEG are represented as dots, and plotted against log-fold changes, while the size indicates the adjusted p-values.

**(E)** Volcano plot highlighting the DEG in the input from OT:RiboTag mice fed SC diet receiving CCK (20 µg/kg BW *i.p.*) relative to vehicle.

**(F)** Heat map of sample-to-sample distance matrix for overall normalized gene expression read counts of both input and IP samples of OT:RiboTag mice fed either SC diet or HFHS diet that were additionally treated with either CCK (20 µg/kg BW *i.p.*) or vehicle. Euclidean distance clustering dendrograms are displayed above.

**Figure S3**

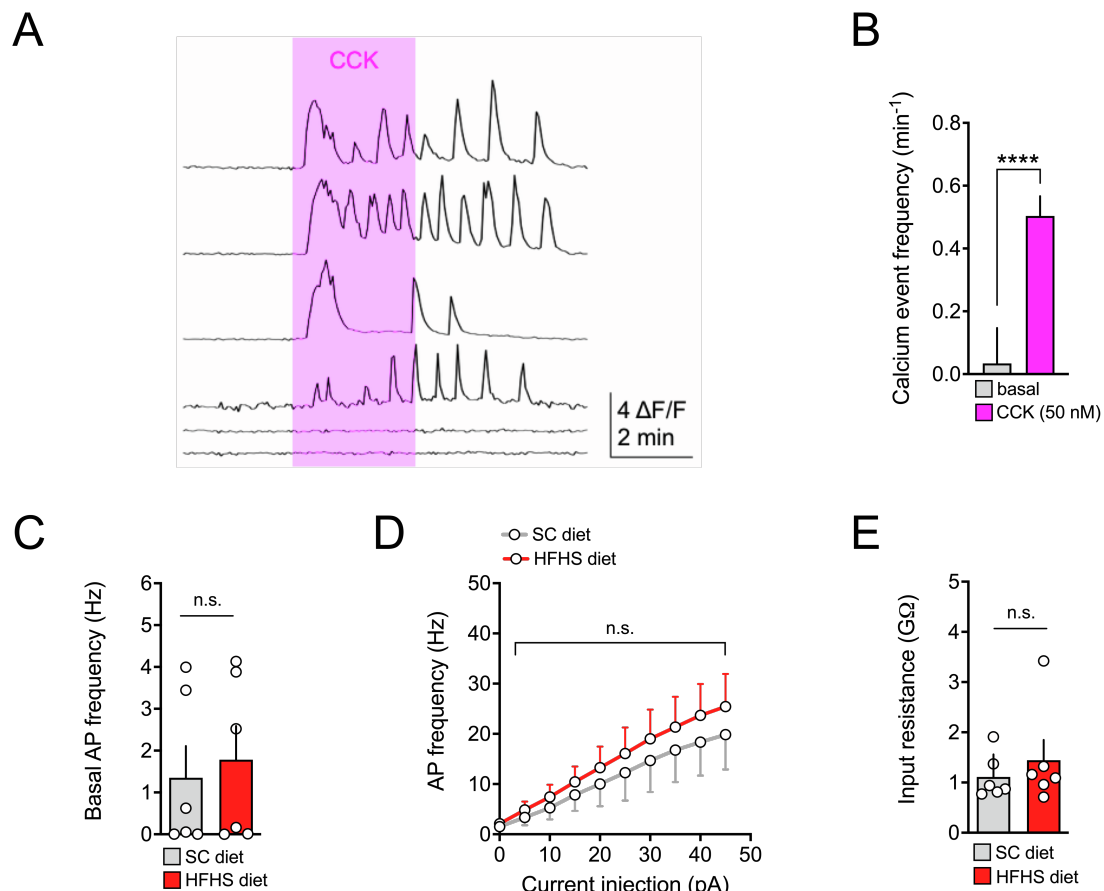

**Figure S3. Related to Figure 3: PVN<sup>OT</sup> neurons are activated by CCK via a direct, CCK<sub>A</sub>R-dependent mechanism in lean but not obese mice.**

**(A)** Cytosolic Ca<sup>2+</sup> transients of individual PVN<sup>OT</sup> neurons (lower panel) upon bath application of CCK (50 nM) in the presence of synaptic blockers.

**(B)** Quantification of Ca<sup>2+</sup> event frequency as summary data of all imaged neurons. Data are presented as mean ± SEM. \*\*\*\* P < 0.0001. n = 1 mouse, 49 neurons (unpaired Student's *t*-test).

**(C)** Quantification of basal action potential frequency of putative magnOT neurons. Data are presented as mean ± SEM. n.s. = not significant. n = 2-3 mice/ 6 neurons per mouse (unpaired Student's *t*-test).

**(D)** Quantification of firing frequency as a function of injected current of putative magnOT neurons. Data are presented as mean ± SEM. n.s. = not significant. n = 2-3 mice/ 6 neurons per mouse (unpaired Student's *t*-test).

**(E)** Quantification of input resistance of putative magnOT neurons. Data is represented as mean ± SEM. n.s. = not significant. n = 2-3 mice/ 6 neurons per mouse (unpaired Student's *t*-test).

**Figure S4**

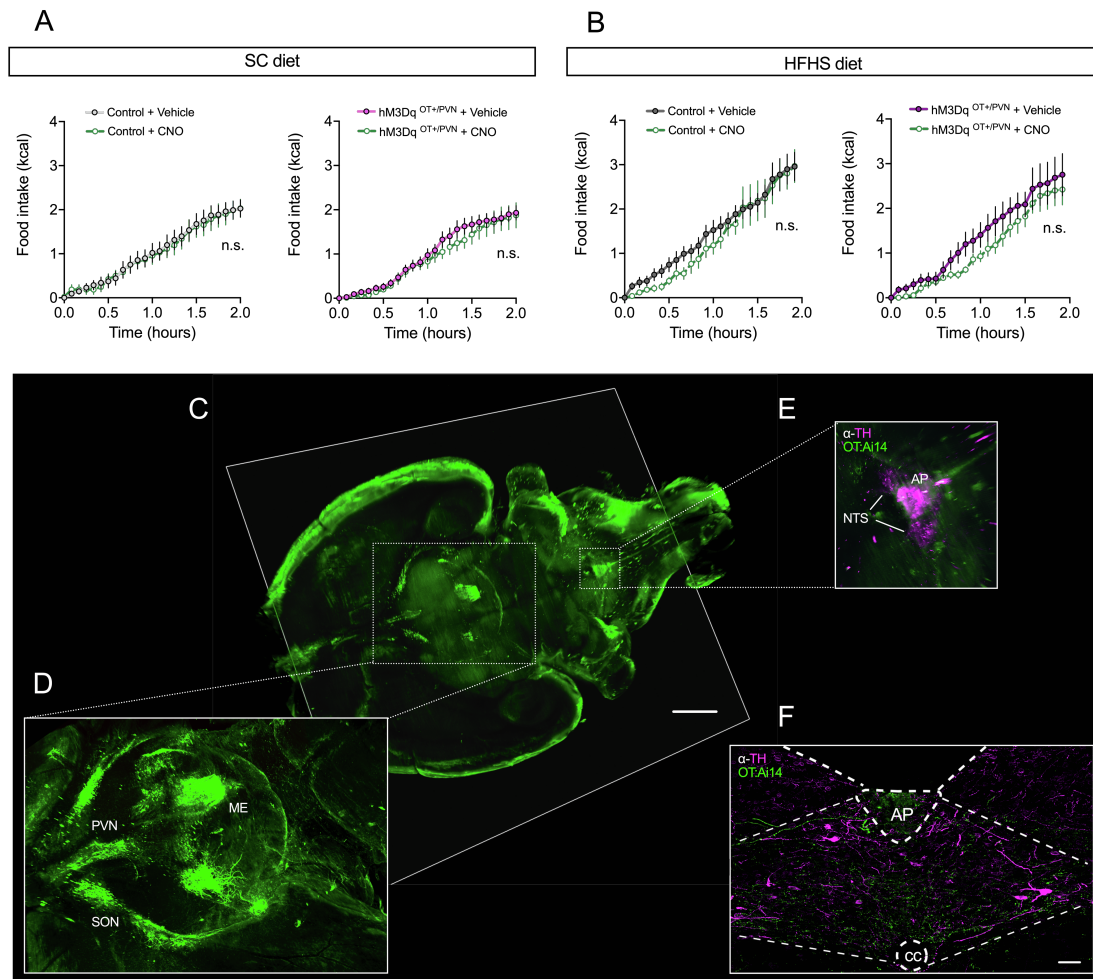

**Figure S4. Related to Figure 4: Blunted suppression of food intake in response to CCK on a HFHS diet is reinstated by concomitant chemogenetic activation of PVN<sup>OT</sup> neurons.**

**(A)** Cumulative food intake of SC diet-fed mice nano-injected with AAV-hSyn-DIO-mCherry (Control) or AAV-hSyn-DIO-hM3Dq-mCherry (hM3Dq<sup>OT+PVN</sup>) upon vehicle versus CNO (1 mg/kg BW *i.p.*). Data are presented as mean  $\pm$  SEM. n.s. = not significant.  $n = 9$  mice in a cross-over design (two-way ANOVA).

**(B)** Cumulative food intake of the same cohort of mice fed HFHS diet-fed for 6 weeks upon vehicle versus CNO (1 mg/kg BW *i.p.*). Data are presented as mean  $\pm$  SEM. n.s. = not significant.  $n = 7-9$  mice in a cross-over design (two-way ANOVA).

**(C)** 3D whole-brain image (horizontal view) of an iDISCO-cleared OT: Ai14 reporter mouse brain subjected to light-sheet fluorescence microscopy. Scale bar, 1 mm.

**(D)** 3D rendered zoom-in image (dashed line insert) of the hypothalamus showing the anatomical organization of the OT system.

(E) 3D rendered zoom-in image (dashed line insert) of the dorsal vagal complex (NTS and AP) in the brainstem containing catecholaminergic TH<sup>+</sup> neurons (magenta) and its innervation by OTerbic fibres (green).

(F) Confocal micrograph of a coronal brain section of the NTS displaying catecholaminergic TH<sup>+</sup> neurons (magenta) and their innervation by OTerbic fibres (green) at high resolution. Scale bar, Scale bar, 100  $\mu$ m.

## Figure S5

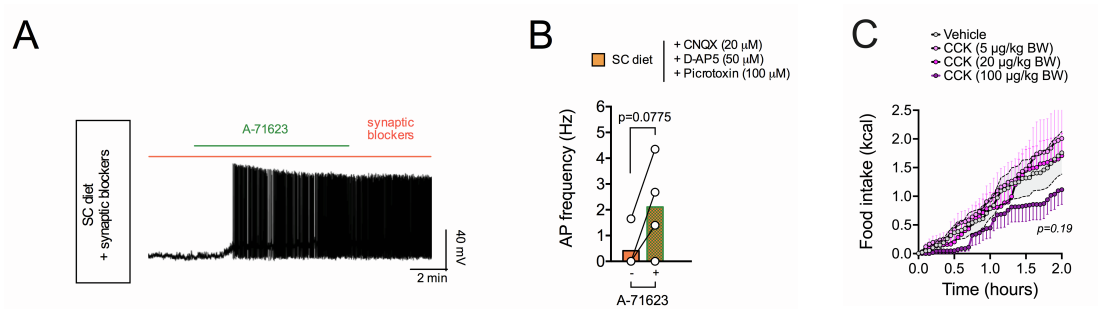

**Figure S5. Related to Figure 5. Intersectoral regulation of hypothalamic OT neurons by CCK<sub>A</sub>R and  $\kappa$ -opioid receptors is dependent on dietary context.**

(A) Representative traces of action potential frequency of magnOT neurons derived from adult male *OT:Ai14* reporter mice fed SC diet in response to bath-applied A-71623 (25 nM) pre-treated with synaptic blocker.

(B) Summary of changes in action potential frequency (right panel). Data are presented before and after application of A-71623 as mean  $\pm$  SEM.  $n = 1$  mouse/ 3 neurons per mouse (paired Students *t*-test).

(C) Cumulative food intake of HFHS diet-fed male C57BL/6J wildtype mice upon injection of low, medium, or high dose CCK (5, 20, and 100  $\mu$ g/kg BW, respectively; *i.p.*) versus vehicle. Given that this experiment was run in conjunction with data presented in Figure 5H the same vehicle control group was used. Data are presented as mean  $\pm$  SEM.  $n = 9$  mice (two-way ANOVA).
